# Supplementary material for: An iron-containing POM-based hybrid compound as a heterogeneous catalyst for one-step hydroxylation of benzene to phenol
Source: Royal Society of Chemistry journal article supplement (doi:10.1039/d3dt03560c), 2023-12-05
Supplement: d3dt03560c1.pdf [file d3dt03560c1.pdf]

## Supplementary Information

### **Iron-containing POM-Based Hybrid Compound as Heterogeneous Catalyst for One-Step Hydroxylation of Benzene to Phenol**

Si-Man Li,<sup>a</sup> Ji-Lei Wang,<sup>a</sup> Jiu-Lin Zhou,<sup>a</sup> Xin-Ying Xiang,<sup>a</sup> Ya-Ting Yu,<sup>a</sup> Qun Chen,<sup>a</sup> Hua Mei\*<sup>a</sup> and Yan Xu\*<sup>a,b</sup>

a. College of Chemical Engineering, State Key Laboratory of Materials-Oriented Chemical Engineering, Nanjing Tech University, Nanjing 211816, P. R. China.

b. State Key Laboratory of Coordination Chemistry, School of Chemistry and Chemical Engineering, Nanjing University, Nanjing 210023, P. R. China.

# Table of Contents

## 1. Experimental section

## 2. Figures

Figure S1 The image of **Fe<sub>2</sub>-PMo<sub>11</sub>V<sub>3</sub>** under optical microscope.

Figure S2 Polyhedral diagram of **Fe<sub>2</sub>-PMo<sub>11</sub>V<sub>3</sub>**.

Figure S3 The 2D layer structure of **Fe<sub>2</sub>-PMo<sub>11</sub>V<sub>3</sub>**, and the hydrogen bonding interactions in **Fe<sub>2</sub>-PMo<sub>11</sub>V<sub>3</sub>**. The crystallization water molecules are omitted for clarity.

Figure S4 The 3D supramolecular structure of **Fe<sub>2</sub>-PMo<sub>11</sub>V<sub>3</sub>** through the hydrogen bonding interactions.

Figure S5 The simulated (black) and experimental (red) power X-ray diffraction patterns of **Fe<sub>2</sub>-PMo<sub>11</sub>V<sub>3</sub>**.

Figure S6 FT-IR spectra of **Fe<sub>2</sub>-PMo<sub>11</sub>V<sub>3</sub>**.

Figure S7 The TG curves of **Fe<sub>2</sub>-PMo<sub>11</sub>V<sub>3</sub>**.

Figure S8 XPS spectra of (a) survey spectra, (b) Fe 2p, (c) Mo 3d, (d) V 2p, for **Fe<sub>2</sub>-PMo<sub>11</sub>V<sub>3</sub>**.

Figure S9 Nitrogen adsorption–desorption isotherm of **Fe<sub>2</sub>-PMo<sub>11</sub>V<sub>3</sub>**.

Figure S10 PXRD patterns of **Fe<sub>2</sub>-PMo<sub>11</sub>V<sub>3</sub>** immersed in acetonitrile at different durations (4 h, 8 h).

Figure S11 Effect of different reaction solvents in the hydroxylation of benzene.

Figure S12 The GC profile under optimal reaction conditions.

Figure S13 The GC-MS trace.

## 3. Tables

Table S1 The bond lengths (Å) of main metal atoms for **Fe<sub>2</sub>-PMo<sub>11</sub>V<sub>3</sub>**.

Table S2 The bond angles (°) of main metal atoms for **Fe<sub>2</sub>-PMo<sub>11</sub>V<sub>3</sub>**.

Table S3 Hydrogen bonds for **Fe<sub>2</sub>-PMo<sub>11</sub>V<sub>3</sub>** [Å and °].

Table S4 The BVS results for the Mo, V and Fe ions in **Fe<sub>2</sub>-PMo<sub>11</sub>V<sub>3</sub>**.

Table S5 The Mo/V ratios of Mo1/V1-Mo6/V6 in **Fe<sub>2</sub>-PMo<sub>11</sub>V<sub>3</sub>**.

Table S6 Nitrogen sorption results of **Fe<sub>2</sub>-PMo<sub>11</sub>V<sub>3</sub>**.

## 4. Reference

## Experimental section

### Instruments

$\text{H}_6\text{PMo}_9\text{V}_3\text{O}_{40}\cdot 32.5\text{H}_2\text{O}$  was prepared according to the method provided in reference<sup>38</sup>. All other chemicals were used commercially available chemicals without further purification. The content of the samples (C, H and N) was through the use of PerkinElmer 2400 element analyzer measurement. Compound PXRD analysis was conducted on Smartlab TM 9 KW diffractometer, using monochromatized Cu-K $\alpha$  ( $\lambda = 0.15418$  nm) radiation ranging from 5 to 50°. FT-IR spectra (4000-400  $\text{cm}^{-1}$ ) were acquired by using a Nicolet Impact 410 FT-IR spectrometer. Thermogravimetric (TG) measurement was performed using a Diamond thermogravimetric analyzer under the environment of nitrogen (25 to 1000 °C, 10 °C min<sup>-1</sup>). X-ray photoelectron spectroscopy (XPS) analysis was performed with AXIS SUPRA from Japan. The F-4600 FL spectrophotometer was used to obtain photoluminescence (PL) spectra at room temperature with an excitation wavelength of 340 nm. Electron paramagnetic resonance (EPR) spectra were taken on Bruker EMX-10/12 electron spin resonance spectrometer at room temperature.

### Synthesis of $\text{H}_6\text{PMo}_9\text{V}_3\text{O}_{40}\cdot 32.5\text{H}_2\text{O}$ .

$\text{MoO}_3$  (12.96 g, 0.090 mol) and  $\text{V}_2\text{O}_5$  (2.73 g, 0.015 mol) with deionized water (250 mL) were heated to 120 °C under vigorous stirring in a flask equipped with a condenser and a magnetic stirrer.  $\text{H}_3\text{PO}_4$  (85%, 1.15 g, 0.010 mol) was added dropwise to 10 mL of water, which was then slowly added dropwise to the above mixture and heated at 120 °C for 24 h to form an orange-red solution. The solution was cooled to room temperature and dried under vacuum at 50 °C for 24 h to obtain an orange fine powder. The powdered solid was recrystallized to obtain the final product.

### Benzene hydroxylation to phenol

The benzene conversion and phenol yields were calculated using the following formulas.

$$\text{Conversion (benzene)} = 1 - \left( \frac{\text{remained benzene concentration}}{\text{initial benzene concentration}} \right) \times 100\%$$

$$\text{Yield (phenol)} = \frac{\text{produced phenol concentration}}{\text{initial benzene concentration}} \times 100\%$$

$$\text{Selectivity} = \frac{\text{Yield (phenol)}}{\text{Conversion (benzene)}} \times 100\%$$

$$\text{Utilization}(\text{H}_2\text{O}_2) = \frac{\text{produced phenol concentration}}{\text{initial H}_2\text{O}_2 \text{ concentration}} \times 100\%$$

### X-ray crystallography

Single-crystal X-ray diffraction of the compounds was carried out and data were collected on a Bruker Apex II CCD diffractometer with graphite monochromatic Mo-K $\alpha$  radiation ( $\lambda = 0.71073$  Å) as the radiation source at 296 K. Hereafter, the crystal structures were resolved by direct methods and refined on F2 by full-matrix least-squares methods via SHELX-2018/3 and the Olex 2 program package. Moreover, the anisotropic thermal parameters were applied to refine all the non-H atoms. Hydrogen atoms on organic molecules in the complexes were obtained by theoretical hydrogenation. Table 1 shows the crystallographic data for  $\text{Fe}_2\text{-PMo}_{11}\text{V}_3$ , while their corresponding bond lengths and angles are displayed in Tables S1 and S2.

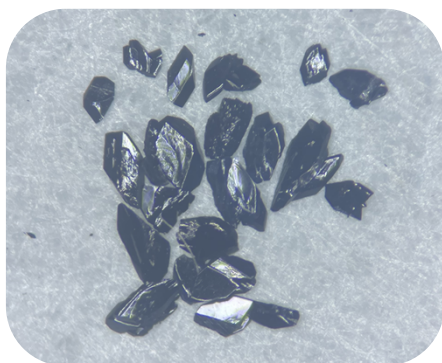

**Figure S1** The image of  $\text{Fe}_2\text{-PMo}_{11}\text{V}_3$  under optical microscope.

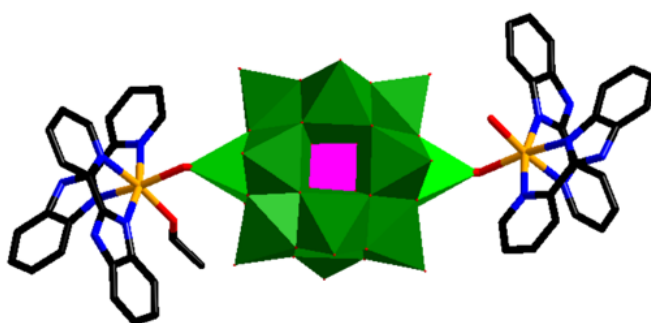

**Figure S2** Polyhedral diagram of  $\text{Fe}_2\text{-PMo}_{11}\text{V}_3$ .

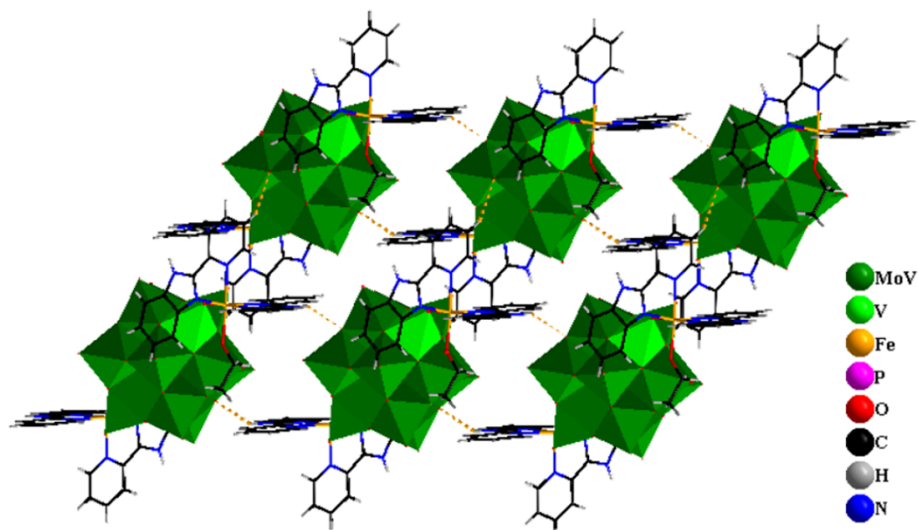

**Figure S3** The 2D layer structure of  $\text{Fe}_2\text{-PMo}_{11}\text{V}_3$ , and the hydrogen bonding interactions in  $\text{Fe}_2\text{-PMo}_{11}\text{V}_3$ . The crystallization water molecules are omitted for clarity.

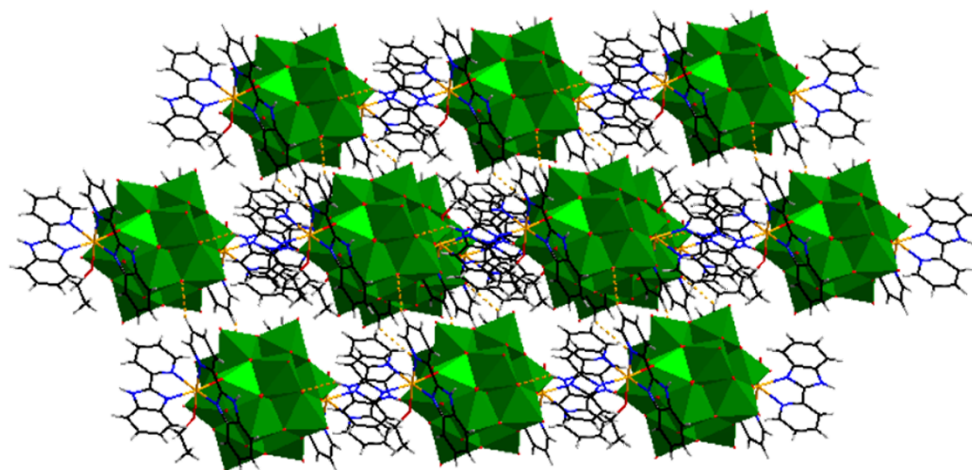

**Figure S4** The 3D supramolecular structure of  $\text{Fe}_2\text{-PMo}_{11}\text{V}_3$  through the hydrogen bonding interactions.

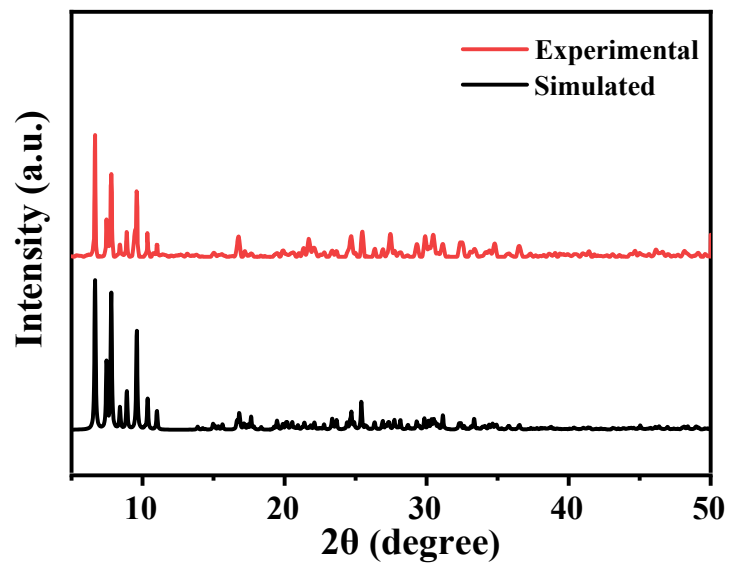

**Figure S5** The simulated (black) and experimental (red) power X-ray diffraction patterns of Fe<sub>2</sub>-PMo<sub>11</sub>V<sub>3</sub>.

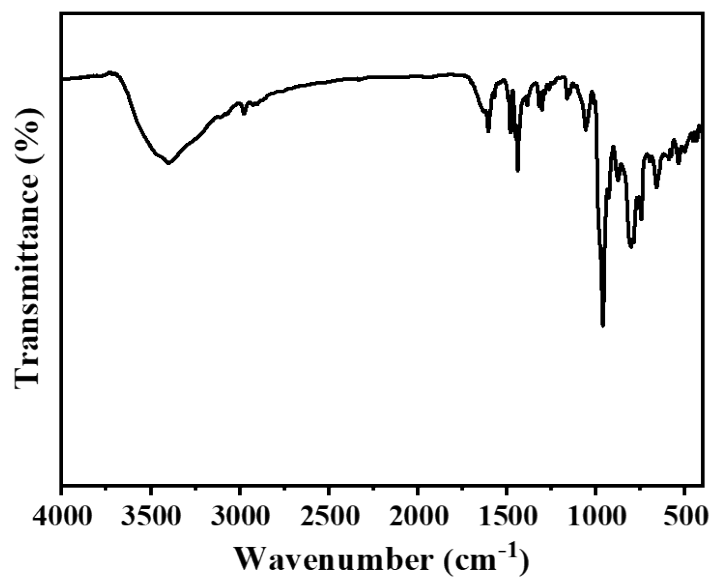

**Figure S6** FT-IR spectrum of Fe<sub>2</sub>-PMo<sub>11</sub>V<sub>3</sub>.

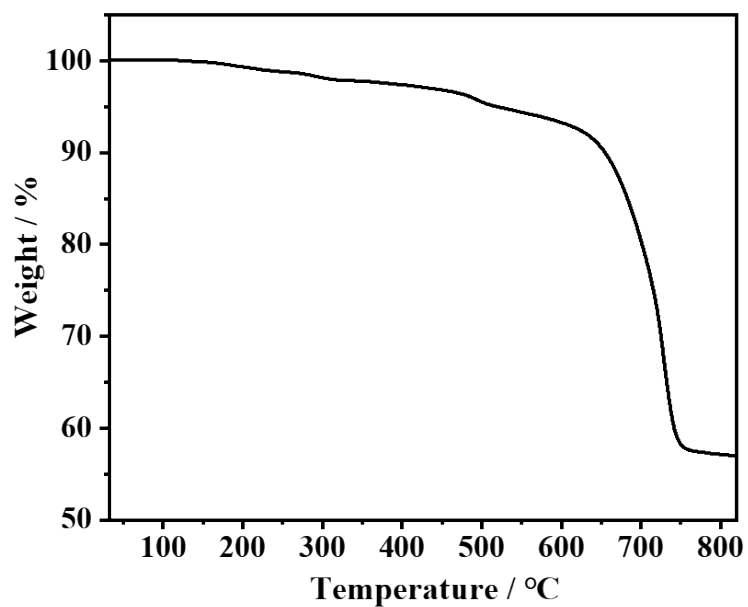

**Figure S7** The TG curves of  $\text{Fe}_2\text{-PMo}_{11}\text{V}_3$ .

In the first part, below 300 °C, the weight loss of 2.63% (calc. 2.67 %) was considered as the loss of one lattice water molecule, one ligated ethanol molecule and one ligated water molecule. In the temperature range of 300 to 650 °C, 6.89% (calc. 6.75 %) of the loss was attributed to the removal of a pyim ligand. When the temperature exceeds 650 °C, the other pyim molecules are gradually removed and the whole M-O framework starts to collapse as the temperature increases further.

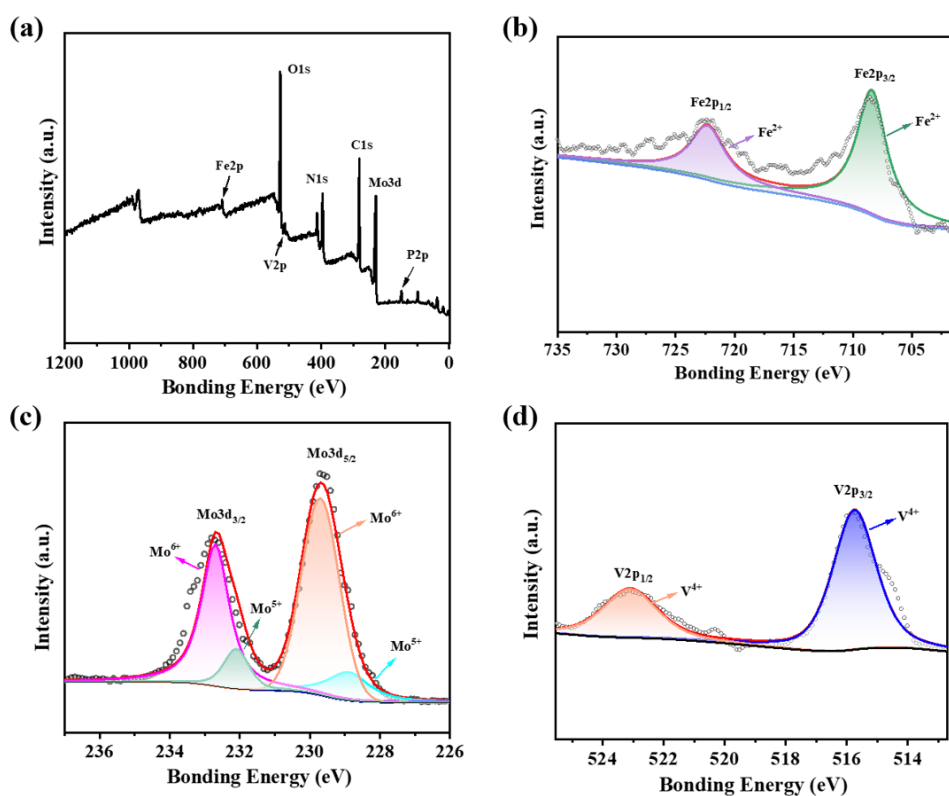

**Figure S8** XPS spectra of (a) survey spectra, (b) Fe 2p, (c) Mo 3d, (d) V 2p, for  $\text{Fe}_2\text{-PMo}_{11}\text{V}_3$ .

As shown in the survey XPS spectrum (Figure S8a), the photoelectron peak is detected for O, V, Mo, N, C, Fe, P, which constituted the catalyst. The Fe2p energy spectrum exhibits two classical peaks attributed to  $\text{Fe}^{2+}$  at 722.7 and 708.7 eV (Figure S8b).<sup>1</sup> The high resolution of Mo3d is presented in Figure S8c, the characteristic binding energies of 232.7 eV and 229.8 eV belong to  $\text{Mo}^{6+}$ , while 232.2 eV and 228.9 eV belong to  $\text{Mo}^{5+}$ .<sup>2</sup> Furthermore, the ratio of the peak areas of  $\text{Mo}^{\text{VI}}3d_{5/2}$  to  $\text{Mo}^{\text{V}}3d_{5/2}$  in XPS is approximately 9:2, indicating a 9:2 ratio of  $\text{Mo}^{6+}$  to  $\text{Mo}^{5+}$ , which is in good agreement with the theoretical calculation results. As illustrated in Figure S8d, the energy spectrum of V2p shows two peaks at 515.8 eV and 523.0 eV, which are attributed to  $\text{V}^{4+}$ .<sup>3</sup>



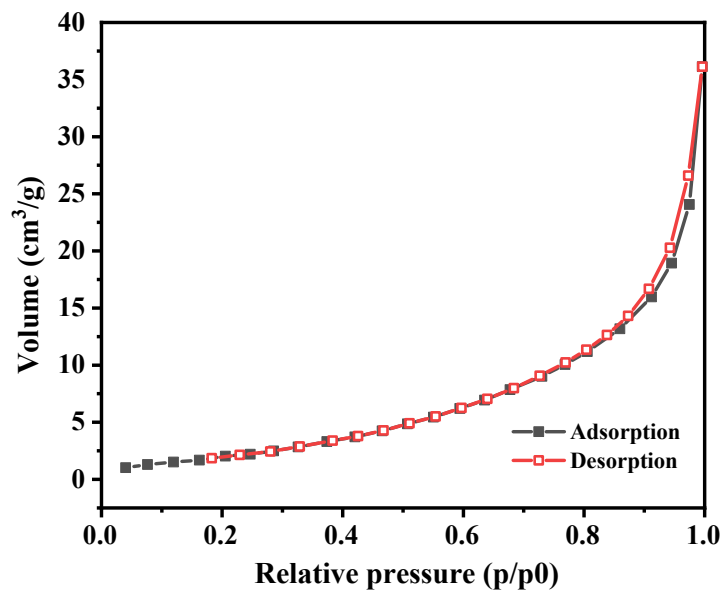

Figure S9 Nitrogen adsorption-desorption isotherm of  $\text{Fe}_2\text{-PMo}_{11}\text{V}_3$ .

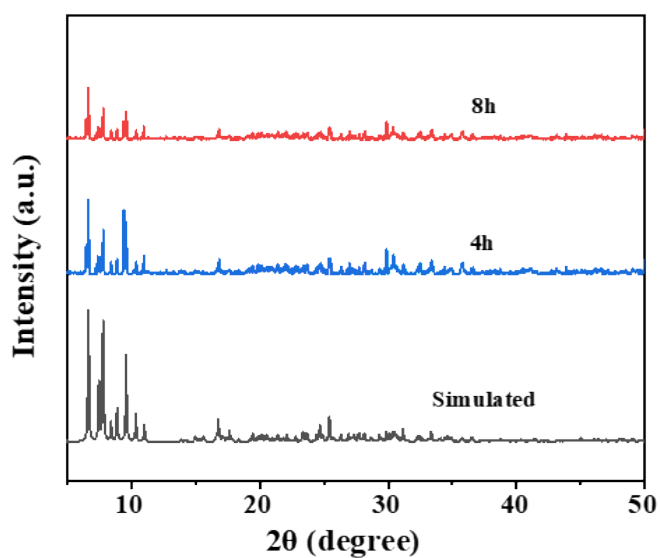

Figure S10 PXRD patterns of  $\text{Fe}_2\text{-PMo}_{11}\text{V}_3$  immersed in acetonitrile at different durations (4 h, 8 h).

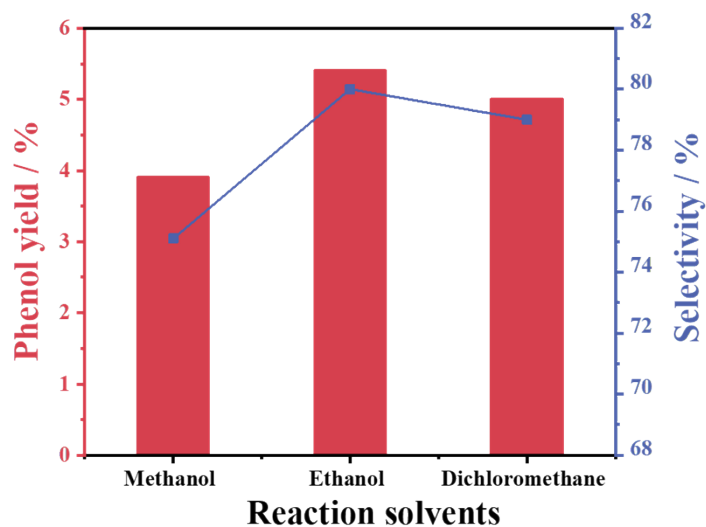

**Figure S11** Effect of different reaction solvents in the hydroxylation of benzene. Reaction conditions: benzene (10 mmol), acetic acid (1 mL), methanol (5 mL), H<sub>2</sub>O<sub>2</sub> (30 mmol), 60 °C, 6 h.

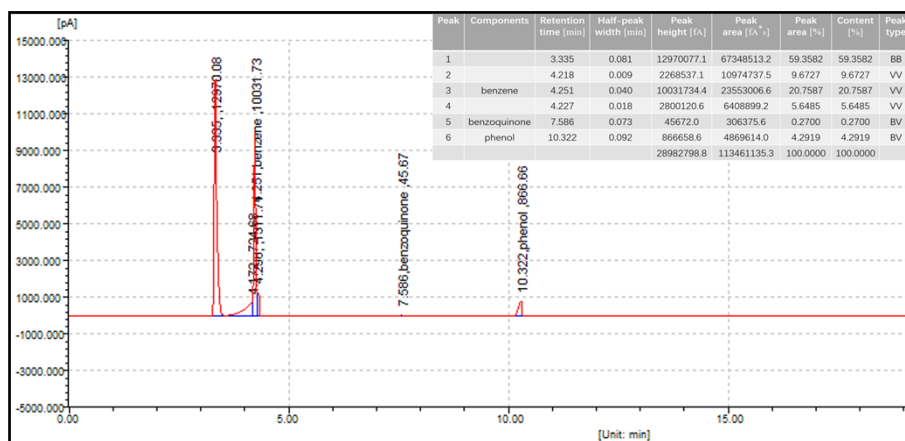

**Figure S12** The GC profile under optimal reaction conditions.

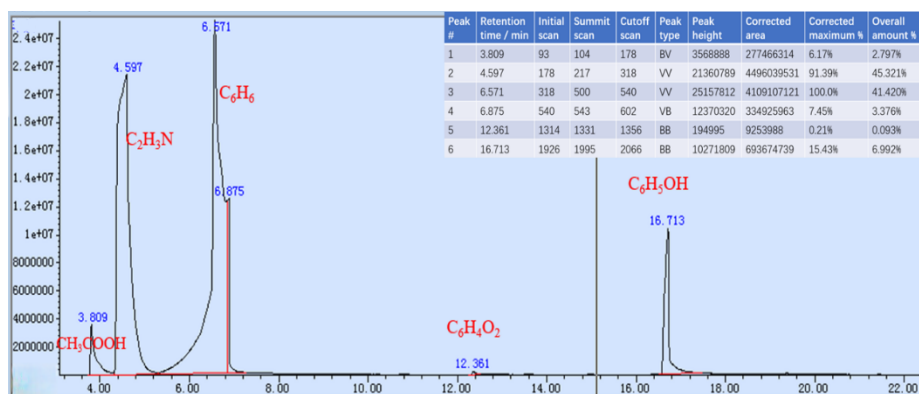

**Figure S13** The GC-MS trace.

**Table S1** The bond lengths (Å) of main metal atoms for **Fe<sub>2</sub>-PMo<sub>11</sub>V<sub>3</sub>**.

|               |           |               |           |
|---------------|-----------|---------------|-----------|
| Mo(1)-O(13)   | 1.655(6)  | Mo(4)-O(21)   | 2.500(10) |
| Mo(1)-O(14)   | 1.809(6)  | Mo(5)-O(8)    | 1.638(6)  |
| Mo(1)-O(10)   | 1.821(6)  | Mo(5)-O(5)#1  | 1.918(6)  |
| Mo(1)-O(23)#1 | 2.045(5)  | Mo(5)-O(15)#1 | 1.922(6)  |
| Mo(1)-O(2)    | 2.071(5)  | Mo(5)-O(14)   | 1.943(6)  |
| Mo(1)-O(19)   | 2.487(8)  | Mo(5)-O(16)   | 1.944(7)  |
| Mo(1)-O(20)   | 2.501(9)  | Mo(6)-O(11)   | 1.630(5)  |
| Mo(2)-O(4)    | 1.654(6)  | Mo(6)-O(18)   | 1.905(6)  |
| Mo(2)-O(5)    | 1.829(6)  | Mo(6)-O(12)   | 1.909(6)  |
| Mo(2)-O(18)   | 1.835(6)  | Mo(6)-O(17)   | 1.949(6)  |
| Mo(2)-O(6)    | 2.044(5)  | Mo(6)-O(10)   | 1.964(7)  |
| Mo(2)-O(23)   | 2.045(5)  | Mo(6)-O(21)   | 2.510(8)  |
| Mo(2)-O(21)   | 2.513(10) | Fe(1)-O(1)    | 2.112(5)  |
| Mo(3)-O(9)    | 1.661(5)  | Fe(1)-N(4)    | 2.120(6)  |
| Mo(3)-O(15)   | 1.816(7)  | Fe(1)-N(2)    | 2.127(7)  |
| Mo(3)-O(12)   | 1.833(6)  | Fe(1)-O(1B)   | 2.158(6)  |
| Mo(3)-O(3)#1  | 2.035(5)  | Fe(1)-N(1)    | 2.186(7)  |
| Mo(3)-O(2)    | 2.065(6)  | Fe(1)-N(5)    | 2.229(6)  |
| Mo(3)-O(22)   | 2.455(9)  | V(7)-O(1)     | 1.638(5)  |
| Mo(4)-O(7)    | 1.659(5)  | V(7)-O(6)     | 1.919(5)  |
| Mo(4)-O(16)   | 1.796(7)  | V(7)-O(23)    | 1.924(6)  |
| Mo(4)-O(17)   | 1.809(7)  | V(7)-O(3)     | 1.929(6)  |
| Mo(4)-O(6)    | 2.042(6)  | V(7)-O(2)#1   | 1.935(5)  |
| Mo(4)-O(3)    | 2.064(5)  |               |           |

Symmetry transformations used to generate equivalent atoms:

#1 -x+1/2, -y+1/2, -z+2

**Table S2** The bond angles (°) of main metal atoms for **Fe<sub>2</sub>-PMo<sub>11</sub>V<sub>3</sub>**.

|                     |          |                      |          |
|---------------------|----------|----------------------|----------|
| O(13)-Mo(1)-O(14)   | 102.7(4) | O(16)-Mo(4)-O(3)     | 88.8(3)  |
| O(13)-Mo(1)-O(10)   | 102.0(4) | O(17)-Mo(4)-O(3)     | 155.3(3) |
| O(14)-Mo(1)-O(10)   | 96.0(3)  | O(6)-Mo(4)-O(3)      | 74.1(2)  |
| O(13)-Mo(1)-O(23)#1 | 100.4(3) | O(7)-Mo(4)-O(21)     | 157.8(3) |
| O(14)-Mo(1)-O(23)#1 | 91.0(2)  | O(16)-Mo(4)-O(21)    | 96.2(4)  |
| O(10)-Mo(1)-O(23)#1 | 154.3(3) | O(17)-Mo(4)-O(21)    | 66.0(3)  |
| O(13)-Mo(1)-O(2)    | 100.0(3) | O(6)-Mo(4)-O(21)     | 62.7(3)  |
| O(14)-Mo(1)-O(2)    | 154.9(3) | O(3)-Mo(4)-O(21)     | 89.4(3)  |
| O(10)-Mo(1)-O(2)    | 89.4(2)  | O(8)-Mo(5)-O(5)#1    | 103.7(3) |
| O(23)#1-Mo(1)-O(2)  | 74.5(2)  | O(8)-Mo(5)-O(15)#1   | 102.8(3) |
| O(13)-Mo(1)-O(19)   | 160.0(3) | O(5)#1-Mo(5)-O(15)#1 | 89.4(3)  |
| O(14)-Mo(1)-O(19)   | 66.4(3)  | O(8)-Mo(5)-O(14)     | 102.8(3) |
| O(10)-Mo(1)-O(19)   | 95.9(3)  | O(5)#1-Mo(5)-O(14)   | 85.8(2)  |
| O(23)#1-Mo(1)-O(19) | 64.4(3)  | O(15)#1-Mo(5)-O(14)  | 154.4(4) |
| O(2)-Mo(1)-O(19)    | 88.7(3)  | O(8)-Mo(5)-O(16)     | 102.9(4) |
| O(13)-Mo(1)-O(20)   | 159.2(3) | O(5)#1-Mo(5)-O(16)   | 153.4(3) |
| O(14)-Mo(1)-O(20)   | 96.4(3)  | O(15)#1-Mo(5)-O(16)  | 86.1(3)  |
| O(10)-Mo(1)-O(20)   | 67.4(3)  | O(14)-Mo(5)-O(16)    | 87.1(3)  |
| O(23)#1-Mo(1)-O(20) | 87.3(3)  | O(11)-Mo(6)-O(18)    | 102.5(4) |
| O(2)-Mo(1)-O(20)    | 63.2(3)  | O(11)-Mo(6)-O(12)    | 101.8(3) |
| O(19)-Mo(1)-O(20)   | 39.3(3)  | O(18)-Mo(6)-O(12)    | 90.2(3)  |
| O(4)-Mo(2)-O(5)     | 103.4(3) | O(11)-Mo(6)-O(17)    | 101.7(4) |
| O(4)-Mo(2)-O(18)    | 103.1(4) | O(18)-Mo(6)-O(17)    | 86.1(3)  |
| O(5)-Mo(2)-O(18)    | 95.6(3)  | O(12)-Mo(6)-O(17)    | 156.5(3) |
| O(4)-Mo(2)-O(6)     | 100.9(3) | O(11)-Mo(6)-O(10)    | 102.3(3) |
| O(5)-Mo(2)-O(6)     | 153.4(3) | O(18)-Mo(6)-O(10)    | 155.1(3) |
| O(18)-Mo(2)-O(6)    | 89.1(2)  | O(12)-Mo(6)-O(10)    | 86.6(3)  |
| O(4)-Mo(2)-O(23)    | 101.7(3) | O(17)-Mo(6)-O(10)    | 87.1(3)  |
| O(5)-Mo(2)-O(23)    | 89.9(2)  | O(11)-Mo(6)-O(21)    | 158.9(3) |
| O(18)-Mo(2)-O(23)   | 152.6(3) | O(18)-Mo(6)-O(21)    | 62.6(3)  |
| O(6)-Mo(2)-O(23)    | 74.8(2)  | O(12)-Mo(6)-O(21)    | 93.6(3)  |
| O(4)-Mo(2)-O(21)    | 157.0(3) | O(17)-Mo(6)-O(21)    | 64.2(3)  |
| O(5)-Mo(2)-O(21)    | 96.5(3)  | O(10)-Mo(6)-O(21)    | 92.9(3)  |
| O(18)-Mo(2)-O(21)   | 63.2(3)  | O(1)-Fe(1)-N(4)      | 95.7(2)  |
| O(6)-Mo(2)-O(21)    | 62.4(3)  | O(1)-Fe(1)-N(2)      | 169.2(3) |
| O(23)-Mo(2)-O(21)   | 89.5(3)  | N(4)-Fe(1)-N(2)      | 95.1(3)  |
| O(9)-Mo(3)-O(15)    | 102.4(3) | O(1)-Fe(1)-O(1B)     | 87.8(2)  |
| O(9)-Mo(3)-O(12)    | 102.7(3) | N(4)-Fe(1)-O(1B)     | 96.4(3)  |
| O(15)-Mo(3)-O(12)   | 95.6(3)  | N(2)-Fe(1)-O(1B)     | 91.3(3)  |
| O(9)-Mo(3)-O(3)#1   | 100.0(3) | O(1)-Fe(1)-N(1)      | 92.5(3)  |
| O(15)-Mo(3)-O(3)#1  | 90.9(2)  | N(4)-Fe(1)-N(1)      | 166.1(3) |
| O(12)-Mo(3)-O(3)#1  | 154.4(3) | N(2)-Fe(1)-N(1)      | 76.9(3)  |
| O(9)-Mo(3)-O(2)     | 100.2(3) | O(1B)-Fe(1)-N(1)     | 95.1(3)  |

|                    |          |                   |          |
|--------------------|----------|-------------------|----------|
| O(15)-Mo(3)-O(2)   | 155.4(3) | O(1)-Fe(1)-N(5)   | 95.1(2)  |
| O(12)-Mo(3)-O(2)   | 88.7(3)  | N(4)-Fe(1)-N(5)   | 76.2(3)  |
| O(3)#1-Mo(3)-O(2)  | 75.7(2)  | N(2)-Fe(1)-N(5)   | 87.2(3)  |
| O(9)-Mo(3)-O(22)   | 158.5(3) | O(1B)-Fe(1)-N(5)  | 172.3(2) |
| O(15)-Mo(3)-O(22)  | 65.5(3)  | N(1)-Fe(1)-N(5)   | 91.8(2)  |
| O(12)-Mo(3)-O(22)  | 96.3(3)  | O(1)-V(7)-O(6)    | 115.4(3) |
| O(3)#1-Mo(3)-O(22) | 64.0(3)  | O(1)-V(7)-O(23)   | 116.1(3) |
| O(2)-Mo(3)-O(22)   | 90.0(3)  | O(6)-V(7)-O(23)   | 80.5(2)  |
| O(7)-Mo(4)-O(16)   | 104.1(4) | O(1)-V(7)-O(3)    | 111.6(3) |
| O(7)-Mo(4)-O(17)   | 102.5(3) | O(6)-V(7)-O(3)    | 80.0(2)  |
| O(16)-Mo(4)-O(17)  | 96.4(4)  | O(23)-V(7)-O(3)   | 132.3(3) |
| O(7)-Mo(4)-O(6)    | 100.1(3) | O(1)-V(7)-O(2)#1  | 112.5(3) |
| O(16)-Mo(4)-O(6)   | 152.3(3) | O(6)-V(7)-O(2)#1  | 132.1(3) |
| O(17)-Mo(4)-O(6)   | 91.1(3)  | O(23)-V(7)-O(2)#1 | 80.5(2)  |
| O(7)-Mo(4)-O(3)    | 99.6(3)  | O(3)-V(7)-O(2)#1  | 81.3(2)  |

**Table S3** Hydrogen bonds for **Fe<sub>2</sub>-PMo<sub>11</sub>V<sub>3</sub>** [ $\text{\AA}$  and  $^\circ$ ].

| D-H...A       | D-H    | H...A  | D...A     | D-H...A |
|---------------|--------|--------|-----------|---------|
| N3-H3...O10   | 0.8600 | 2.3000 | 3.025(11) | 142.00  |
| N6-H6...O2    | 0.8600 | 2.5900 | 3.395(9)  | 156.00  |
| C14-H14...O11 | 0.9300 | 2.5700 | 3.254(14) | 130.00  |
| C21-H21...O9  | 0.9300 | 2.5400 | 3.194(13) | 127.00  |
| C23-H23...O12 | 0.9300 | 2.4900 | 3.332(12) | 151.00  |

**Table S4** The BVS results for the Mo, V and Fe ions in **Fe<sub>2</sub>-PMo<sub>11</sub>V<sub>3</sub>**.

|         |         | Bond distance    | BVS calc. for Mo(V) | BVS calc. for Mo(VI) |         |         | Bond distance    | BVS calc. for Mo(V) | BVS calc. for Mo(VI) |
|---------|---------|------------------|---------------------|----------------------|---------|---------|------------------|---------------------|----------------------|
|         |         | ( $\text{\AA}$ ) |                     |                      |         |         | ( $\text{\AA}$ ) |                     |                      |
| Mo1(V1) | O(13)   | 1.655            | 1.8271              | 1.9390               | Mo4(V4) | O(7)    | 1.659            | 1.8074              | 1.9181               |
|         | O(14)   | 1.809            | 1.2050              | 1.2788               |         | O(16)   | 1.796            | 1.2481              | 1.3246               |
|         | O(10)   | 1.821            | 1.1666              | 1.2380               |         | O(17)   | 1.809            | 1.2050              | 1.2788               |
|         | O(23)#1 | 2.045            | 0.6368              | 0.6758               |         | O(6)    | 2.042            | 0.6420              | 0.6813               |
|         | O(2)    | 2.071            | 0.5936              | 0.6299               |         | O(3)    | 2.064            | 0.6049              | 0.6420               |
|         | O(19)   | 2.487            | 0.1928              | 0.2046               |         | O(21)   | 2.500            | 0.1862              | 0.1976               |
|         | O(20)   | 2.501            | 0.1857              | 0.1970               |         |         |                  |                     |                      |
| Charge  |         |                  | 5.8074              | 6.1632               | Charge  |         | 5.6935           | 6.0423              |                      |
| Mo2(V2) | O(4)    | 1.654            | 1.8320              | 1.9442               | Mo5(V5) | O(8)    | 1.638            | 1.8469              | 1.9601               |
|         | O(5)    | 1.829            | 1.1416              | 1.2115               |         | O(5)#1  | 1.918            | 0.9048              | 0.9603               |
|         | O(18)   | 1.835            | 1.1232              | 1.1921               |         | O(15)#1 | 1.922            | 0.8903              | 0.9448               |
|         | O(6)    | 2.044            | 0.6385              | 0.6776               |         | O(14)   | 1.943            | 0.8389              | 0.8903               |
|         | O(23)   | 2.045            | 0.6368              | 0.6758               |         | O(16)   | 1.944            | 0.8366              | 0.8879               |
|         | O(21)   | 2.513            | 0.1797              | 0.1908               |         |         |                  |                     |                      |
| Charge  |         |                  | 5.5518              | 5.8920               | Charge  |         | 5.3175           | 5.6433              |                      |
| Mo3(V3) | O(9)    | 1.661            | 1.7977              | 1.9078               | Mo6(V6) | O(11)   | 1.630            | 1.9548              | 2.0745               |

|        |       |        |        |        |       |        |        |
|--------|-------|--------|--------|--------|-------|--------|--------|
| O(15)  | 1.816 | 1.1824 | 1.2549 | O(18)  | 1.905 | 0.9296 | 0.9866 |
| O(12)  | 1.833 | 1.1293 | 1.1985 | O(12)  | 1.909 | 0.9196 | 0.9760 |
| O(3)#1 | 2.035 | 0.6542 | 0.6943 | O(17)  | 1.949 | 0.8254 | 0.8760 |
| O(2)   | 2.065 | 0.6033 | 0.6402 | O(10)  | 1.964 | 0.7926 | 0.8412 |
| O(22)  | 2.455 | 0.2102 | 0.2231 | O(21)  | 2.510 | 0.1812 | 0.1923 |
| Charge |       | 5.5771 | 5.9188 | Charge |       | 5.6032 | 5.9465 |

The calculated value of average oxidation state of Mo: 5.890

The theoretical value of average oxidation state of Mo: 5.880

|         |         | Bond<br>distance<br>(Å) | BVS<br>calc. for<br>V(III) | BVS<br>calc. for<br>V(IV) | BVS<br>calc. for<br>V(V) |
|---------|---------|-------------------------|----------------------------|---------------------------|--------------------------|
| V1(Mo1) | O(13)   | 1.655                   | 1.2892                     | 1.4019                    | 1.4918                   |
|         | O(14)   | 1.809                   | 0.8503                     | 0.9246                    | 0.9839                   |
|         | O(10)   | 1.821                   | 0.8232                     | 0.8951                    | 0.9525                   |
|         | O(23)#1 | 2.045                   | 0.4493                     | 0.4886                    | 0.5199                   |
|         | O(2)    | 2.071                   | 0.4188                     | 0.4554                    | 0.4847                   |
|         | O(19)   | 2.487                   | 0.1361                     | 0.1480                    | 0.1574                   |
|         | O(20)   | 2.501                   | 0.1310                     | 0.1425                    | 0.1516                   |
| Charge  |         |                         | 3.9669                     | 4.3136                    | 4.5903                   |
| V2(Mo2) | O(4)    | 1.654                   | 1.2927                     | 1.4057                    | 1.4959                   |
|         | O(5)    | 1.829                   | 0.8056                     | 0.8760                    | 0.9321                   |
|         | O(18)   | 1.835                   | 0.7926                     | 0.8619                    | 0.9171                   |
|         | O(6)    | 2.044                   | 0.4505                     | 0.4899                    | 0.5213                   |
|         | O(23)   | 2.045                   | 0.4493                     | 0.4886                    | 0.5199                   |
|         | O(21)   | 2.513                   | 0.1268                     | 0.1379                    | 0.1468                   |
| Charge  |         |                         | 3.9176                     | 4.2600                    | 4.5332                   |
| V3(Mo3) | O(9)    | 1.661                   | 1.2685                     | 1.3794                    | 1.4678                   |
|         | O(15)   | 1.816                   | 0.8344                     | 0.9073                    | 0.9655                   |
|         | O(12)   | 1.833                   | 0.7969                     | 0.8665                    | 0.9221                   |
|         | O(3)#1  | 2.035                   | 0.4616                     | 0.5020                    | 0.5342                   |
|         | O(2)    | 2.065                   | 0.4257                     | 0.4629                    | 0.4926                   |
|         | O(22)   | 2.455                   | 0.1484                     | 0.1613                    | 0.1717                   |
| Charge  |         |                         | 3.9355                     | 4.2794                    | 4.5538                   |
| V4(Mo4) | O(7)    | 1.659                   | 1.2754                     | 1.3868                    | 1.4758                   |
|         | O(16)   | 1.796                   | 0.8807                     | 0.9577                    | 1.0191                   |
|         | O(17)   | 1.809                   | 0.8503                     | 0.9246                    | 0.9839                   |
|         | O(6)    | 2.042                   | 0.4530                     | 0.4926                    | 0.5242                   |
|         | O(3)    | 2.064                   | 0.4268                     | 0.4338                    | 0.4939                   |
|         | O(21)   | 2.500                   | 0.1314                     | 0.1429                    | 0.1520                   |
| Charge  |         |                         | 4.0176                     | 4.3384                    | 4.6489                   |
| V5(Mo5) | O(8)    | 1.638                   | 1.3499                     | 1.4678                    | 1.5620                   |
|         | O(5)#1  | 1.918                   | 0.6333                     | 0.6887                    | 0.7329                   |
|         | O(15)#1 | 1.922                   | 0.6265                     | 0.6813                    | 0.7250                   |
|         | O(14)   | 1.943                   | 0.5920                     | 0.6437                    | 0.6850                   |

|         |        |       |        |        |        |
|---------|--------|-------|--------|--------|--------|
|         | O(16)  | 1.944 | 0.5904 | 0.6420 | 0.6831 |
| Charge  |        |       | 3.7920 | 4.1234 | 4.3879 |
| V6(Mo6) | O(11)  | 1.630 | 1.3794 | 1.4999 | 1.5961 |
|         | O(18)  | 1.905 | 0.6560 | 0.7133 | 0.7591 |
|         | O(12)  | 1.909 | 0.6489 | 0.7056 | 0.7509 |
|         | O(17)  | 1.949 | 0.5824 | 0.6333 | 0.6740 |
|         | O(10)  | 1.964 | 0.5593 | 0.6082 | 0.6472 |
|         | O(21)  | 2.510 | 0.1279 | 0.1390 | 0.1480 |
| Charge  |        |       | 3.9539 | 4.2994 | 4.5752 |
| V7      | O(1)   | 1.638 | 1.3499 | 1.4678 | 1.5620 |
|         | O(6)   | 1.919 | 0.6316 | 0.6868 | 0.7309 |
|         | O(23)  | 1.924 | 0.6231 | 0.6776 | 0.7211 |
|         | O(3)   | 1.929 | 0.6148 | 0.6685 | 0.7114 |
|         | O(2)#1 | 1.935 | 0.6049 | 0.6578 | 0.6999 |
| Charge  |        |       | 3.8243 | 4.1585 | 4.4252 |

|        |       | Bond distance (Å) | BVS calc. for Fe(II) | BVS calc. for Fe(III) |
|--------|-------|-------------------|----------------------|-----------------------|
| Fe1    | O(1)  | 2.112             | 0.3600               | 0.3852                |
|        | N(4)  | 2.120             | 0.4280               | 0.4385                |
|        | N(2)  | 2.127             | 0.4200               | 0.4303                |
|        | O(1B) | 2.158             | 0.3179               | 0.3401                |
|        | N(1)  | 2.186             | 0.3581               | 0.3669                |
|        | N(5)  | 2.229             | 0.2624               | 0.2808                |
| Charge |       |                   | 2.1464               | 2.2418                |

**Table S5** The Mo/V ratios of Mo1/V1-Mo6/V6 in **Fe<sub>2</sub>-PMo<sub>11</sub>V<sub>3</sub>**.

| Ratio  | Mo   | V    |
|--------|------|------|
| Mo1/V1 | 0.96 | 0.04 |
| Mo2/V2 | 0.94 | 0.06 |
| Mo3/V3 | 0.94 | 0.06 |
| Mo4/V4 | 0.94 | 0.06 |
| Mo5/V5 | 0.84 | 0.16 |
| Mo6/V6 | 0.83 | 0.17 |

**Table S6** Nitrogen sorption results of **Fe<sub>2</sub>-PMo<sub>11</sub>V<sub>3</sub>**.

| Catalyst                                            | A <sub>BET</sub> (m <sup>2</sup> /g) | Pore volume (cm <sup>3</sup> /g) | Average pore diameter (nm) |
|-----------------------------------------------------|--------------------------------------|----------------------------------|----------------------------|
| <b>Fe<sub>2</sub>-PMo<sub>11</sub>V<sub>3</sub></b> | 8.856                                | 0.050                            | 22.794                     |

## References

1. J. An, Y. Wang, W. Dong, X. Gao, O. Yang, Y. Liu, J. Zhao and D. Li, *ACS Appl. Energy Mater.* 2022, **5**, 2384-2390.
2. I. Tamiolakis, I.N. Lykakis, A.P. Katsoulidis, M. Stratakis and G.S. Armatas, *Chem. Mater.* 2011, **23**, 4204-4211.
3. L. Zhou, L. Wang, S. Zhang, R. Yan and Y. Diao, *J. Catal.* 2015, **329**, 431-440.
